# Supplementary material for: Transient kinetic studies of the antiviral Drosophila Dicer-2 reveal roles of ATP in self–nonself discrimination
Source: eLife journal article supplement (doi:10.7554/elife.65810), 2021-03-31
Supplement: supp [file elife_poa_e65810_Figure_1_figure_supplement_2.pdf › elife_poa_e65810_Figure_1_figure_supplement_2.pdf]

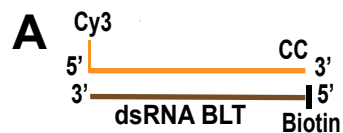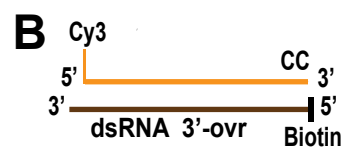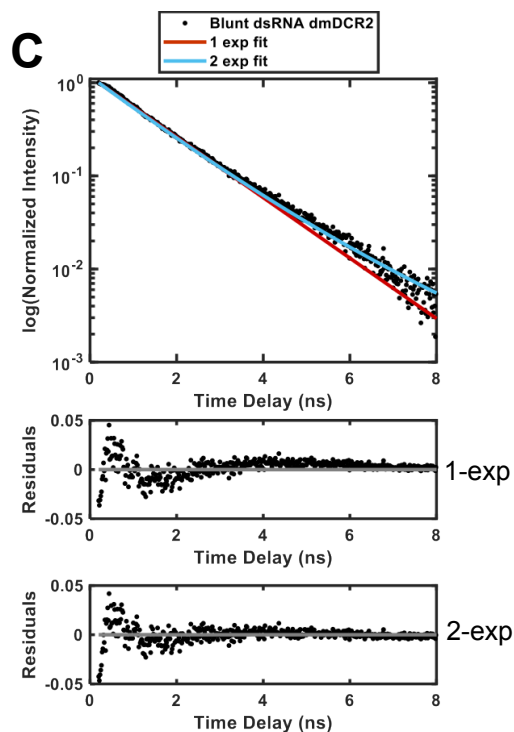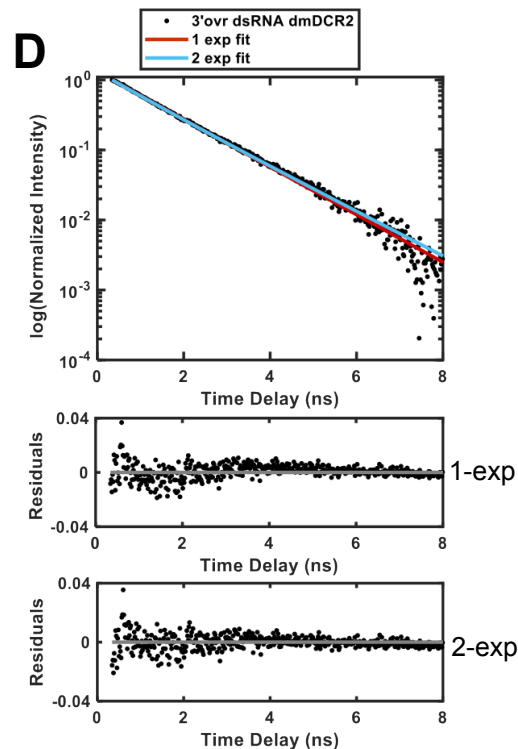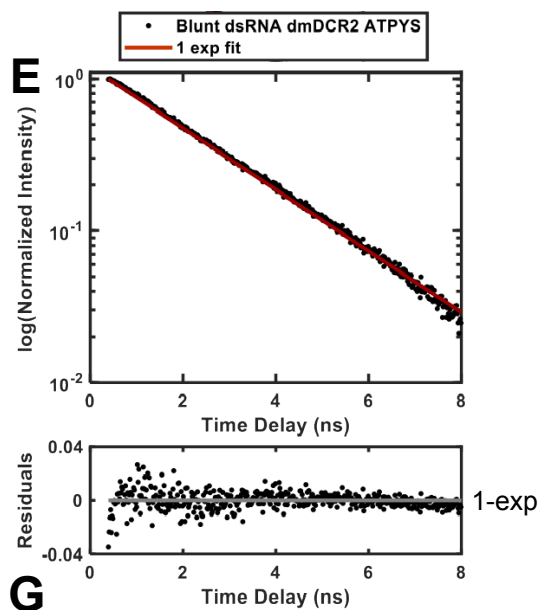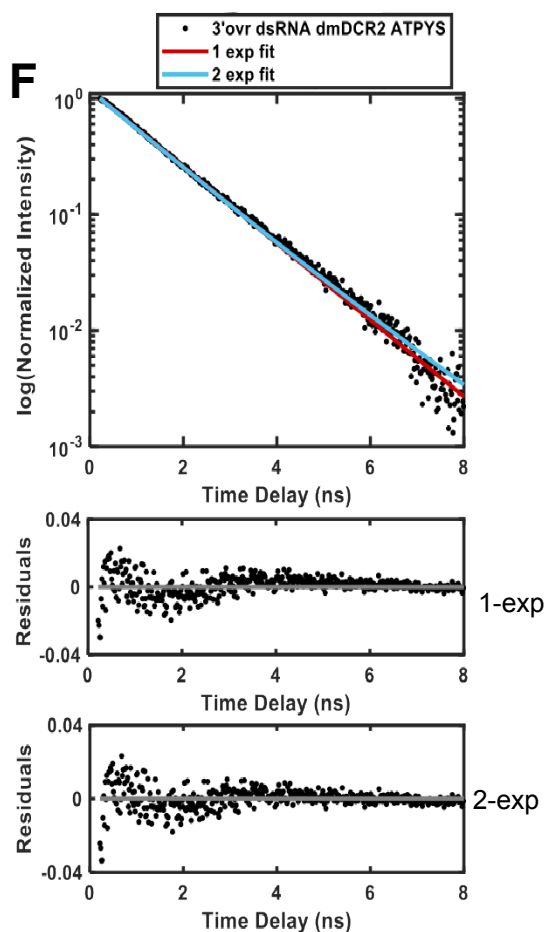

| Fluorescence life-time                       | Cy3-Blunt dsRNA                                                                        | Cy3'-ovr dsRNA                     |
|----------------------------------------------|----------------------------------------------------------------------------------------|------------------------------------|
| dsRNA alone                                  | $\tau = 1.15 \pm 0.003 \text{ ns}$                                                     | $\tau = 1.26 \pm 0.003 \text{ ns}$ |
| dmDcr-2 <sup>RIII</sup>                      | $\tau_1 = 1.21 \pm 0.04 \text{ ns}$ (88%)<br>$\tau_2 = 2.28 \pm 0.36 \text{ ns}$ (12%) | $\tau = 1.28 \pm 0.002 \text{ ns}$ |
| dmDcr-2 <sup>RIII</sup> + ATP <sub>γ</sub> S | $\tau = 2.15 \pm 0.003 \text{ ns}$                                                     | $\tau = 1.31 \pm 0.002 \text{ ns}$ |

**Figure 1-supplement 2**
