# Supplementary material for: Transient kinetic studies of the antiviral Drosophila Dicer-2 reveal roles of ATP in self–nonself discrimination
Source: eLife journal article supplement (doi:10.7554/elife.65810), 2021-03-31
Supplement: supp [file elife_poa_e65810_Figure_2_figure_supplement_1.pdf › elife_poa_e65810_Figure_2_figure_supplement_1.pdf]

### A Scheme for dsRNA Association

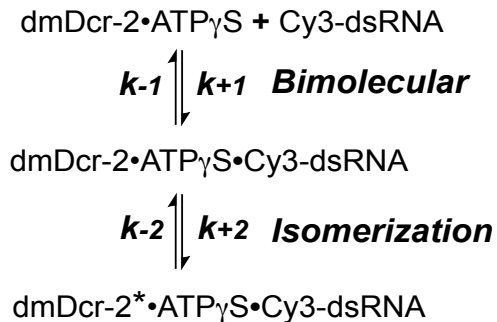

$$k_{obs1} = k_{+1} [\text{dmDcr-2}] + k_{-1}$$

$$k_{obs2} = k_{+2} + k_{-2}$$

### B Scheme for dsRNA Dissociation

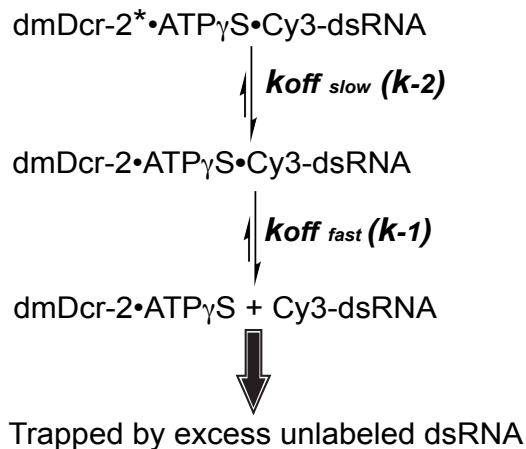

### C Comparison between kinetically- and equilibrium-determined K<sub>d</sub> values

| dsRNA          | $k_{+1}$<br>(M <sup>-1</sup> s <sup>-1</sup> ) | $k_{-1}$<br>(s <sup>-1</sup> ) | $k_{+2}$<br>(s <sup>-1</sup> ) | $k_{-2}$<br>(s <sup>-1</sup> ) | $K_d$ (μM)<br>Kinetic<br>Method | $K_d$ (μM)<br>Equilibrium<br>Method |
|----------------|------------------------------------------------|--------------------------------|--------------------------------|--------------------------------|---------------------------------|-------------------------------------|
| BLT<br>dsRNA   | $1.1 \times 10^6$                              | 0.12                           | 0.01                           | 0.002                          | 0.02                            | 0.05                                |
| 3'ovr<br>dsRNA | $1.6 \times 10^5$                              | 0.20                           | 0.006                          | 0.004                          | 0.83                            | 0.06                                |

Figure 2-supplement 1
