# Supplementary material for: Transient kinetic studies of the antiviral Drosophila Dicer-2 reveal roles of ATP in self–nonself discrimination
Source: eLife journal article supplement (doi:10.7554/elife.65810), 2021-03-31
Supplement: supp [file elife_poa_e65810_Figure_5_figure_supplement_2.pdf › elife_poa_e65810_Figure_5_figure_supplement_2.pdf]

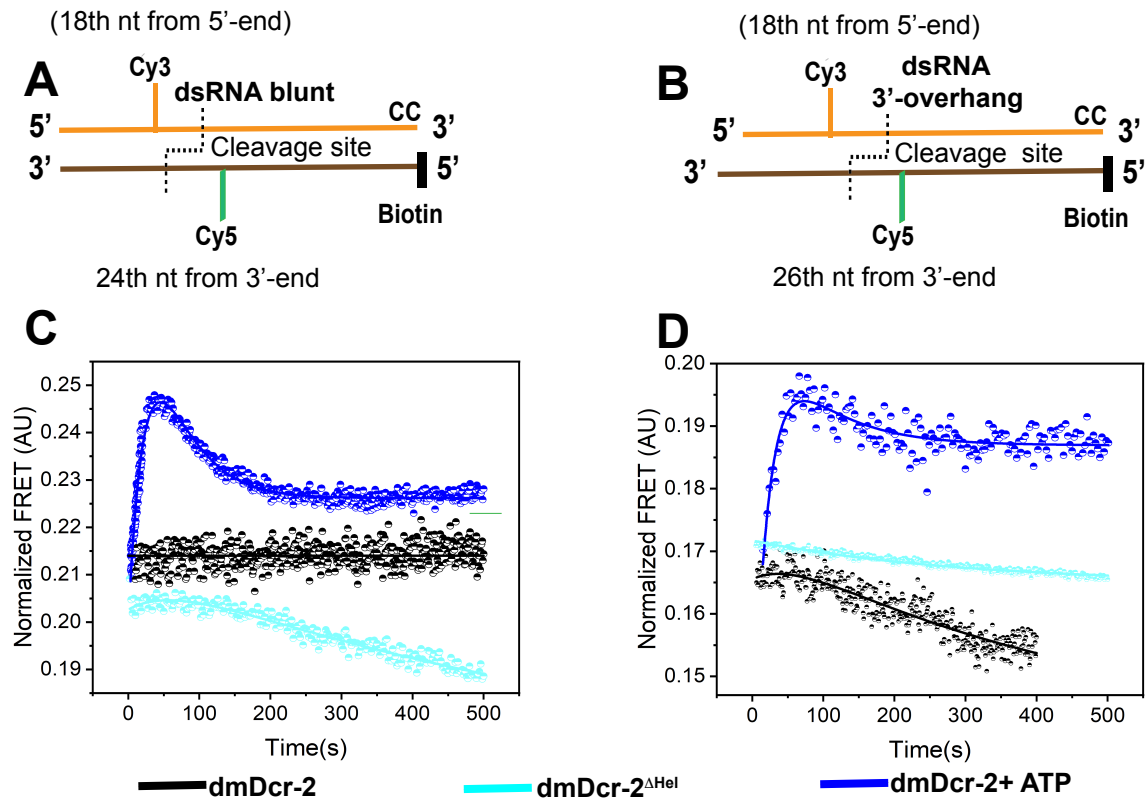

### E Kinetic parameters of dsRNA cleavage

| Kinetic parameters      | BLT dsRNA                                                | 3'ovr dsRNA                                              |
|-------------------------|----------------------------------------------------------|----------------------------------------------------------|
| dmDcr-2                 | Not detected                                             | $t1_{1/2} = 39.5 \pm 5.0s$<br>$t2_{1/2} = 277 \pm 10s$   |
| dmDcr-2 + ATP           | $t1_{1/2} = 15.9 \pm 0.2s$<br>$t2_{1/2} = 43.2 \pm 1.2s$ | $t1_{1/2} = 27.7 \pm 1.4s$<br>$t2_{1/2} = 83.8 \pm 4.5s$ |
| dmDcr-2 <sup>ΔHel</sup> | $t1_{1/2} = 41.6 \pm 2.2s$<br>$t2_{1/2} = 490 \pm 50s$   | $t1_{1/2} = 208 \pm 20s$                                 |

**Figure 5-supplement 2**
