# Supplementary figures and images for: Transient kinetic studies of the antiviral Drosophila Dicer-2 reveal roles of ATP in self–nonself discrimination
Source: eLife journal article supplement (doi:10.7554/elife.65810), 2021-03-31

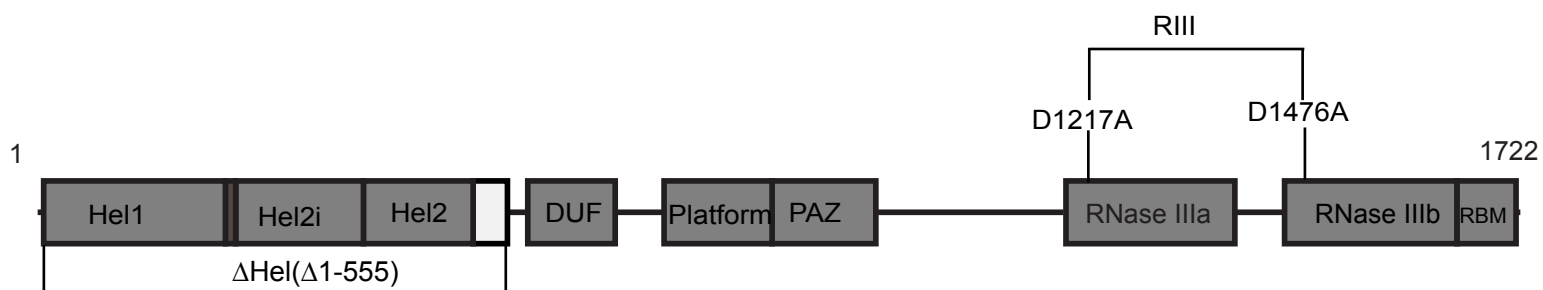

**Figure 1-supplement 1**

Supplement: supp [file elife_poa_e65810_Figure_1_figure_supplement_1.pdf › elife_poa_e65810_Figure_1_figure_supplement_1.pdf]

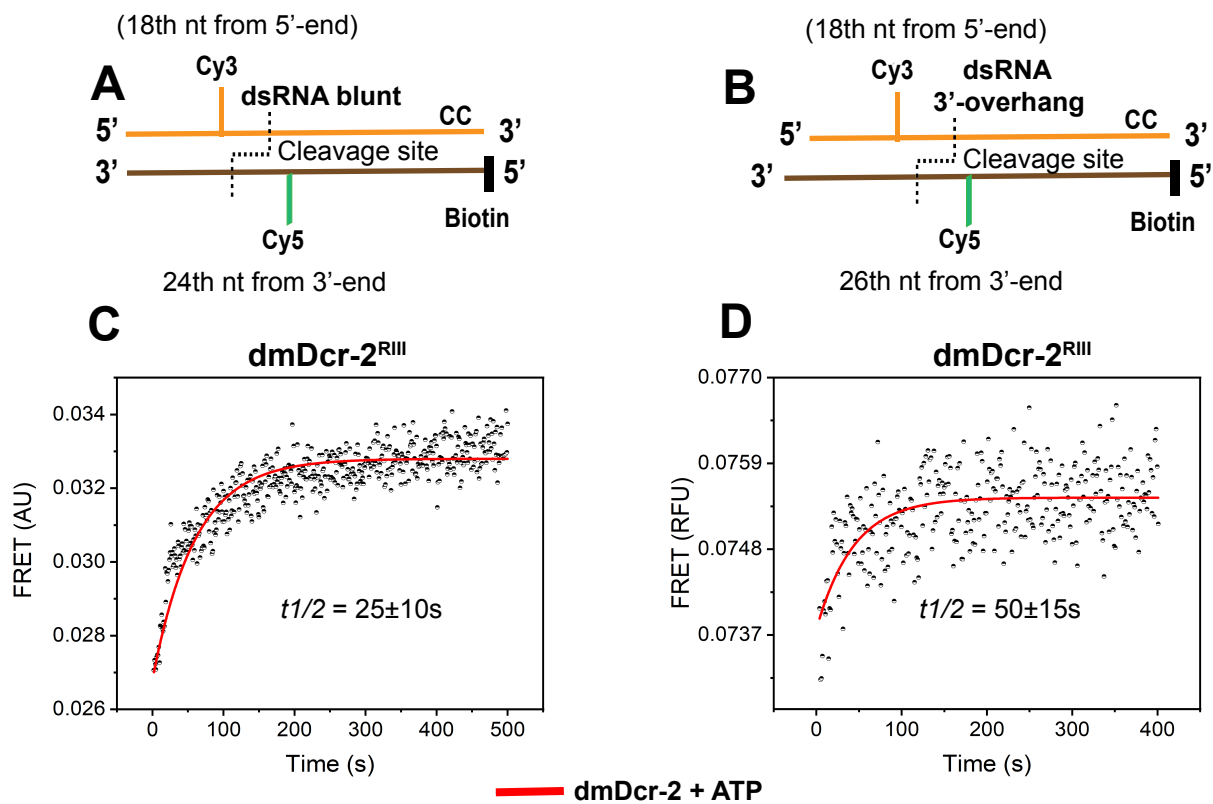

**Figure 5-supplement 1**

Supplement: supp [file elife_poa_e65810_Figure_5_figure_supplement_1.pdf › elife_poa_e65810_Figure_5_figure_supplement_1.pdf]

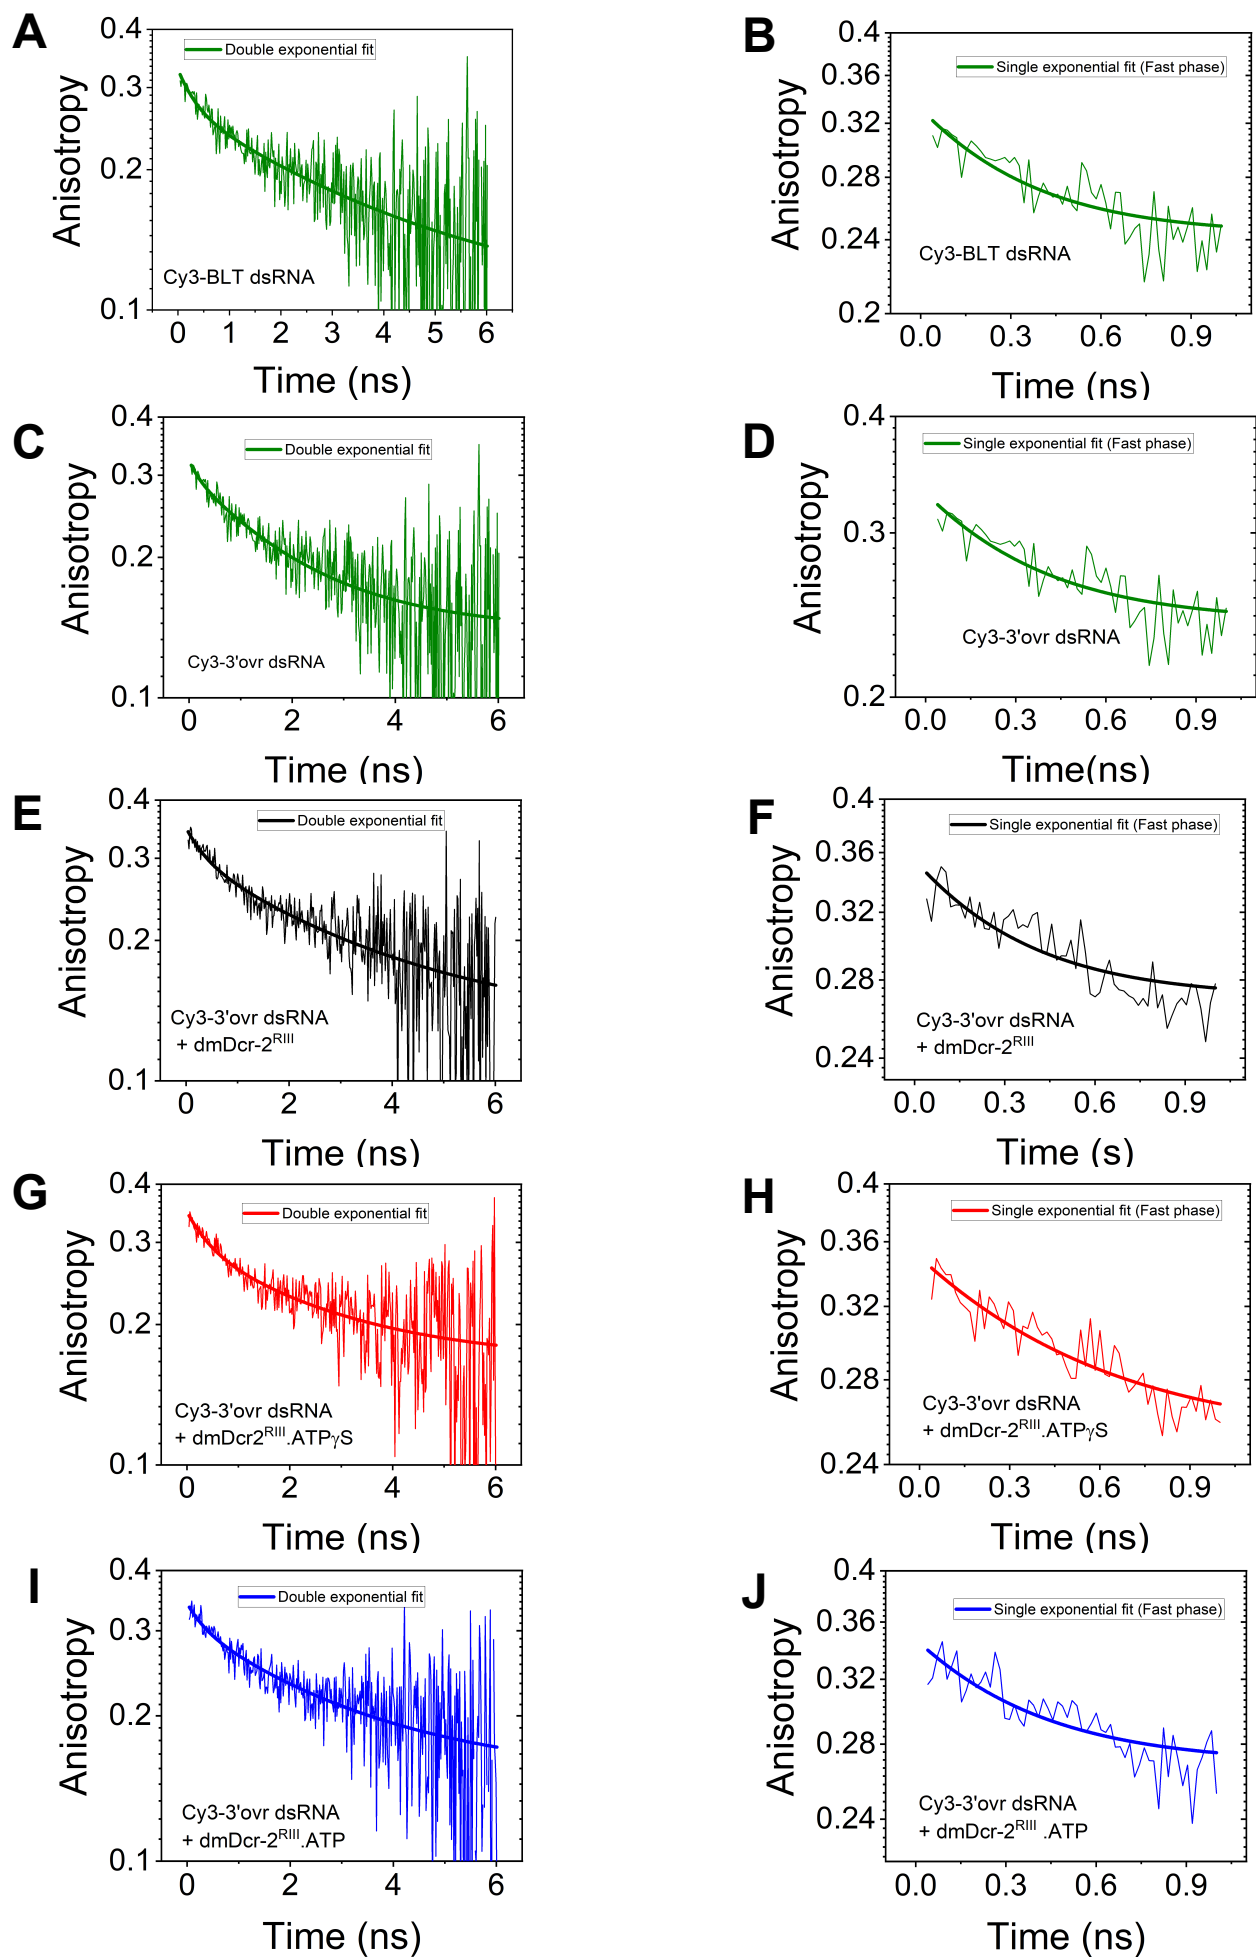

**Figure 6-supplement 1**

Supplement: supp [file elife_poa_e65810_Figure_6_figure_supplement_1.pdf › elife_poa_e65810_Figure_6_figure_supplement_1.pdf]

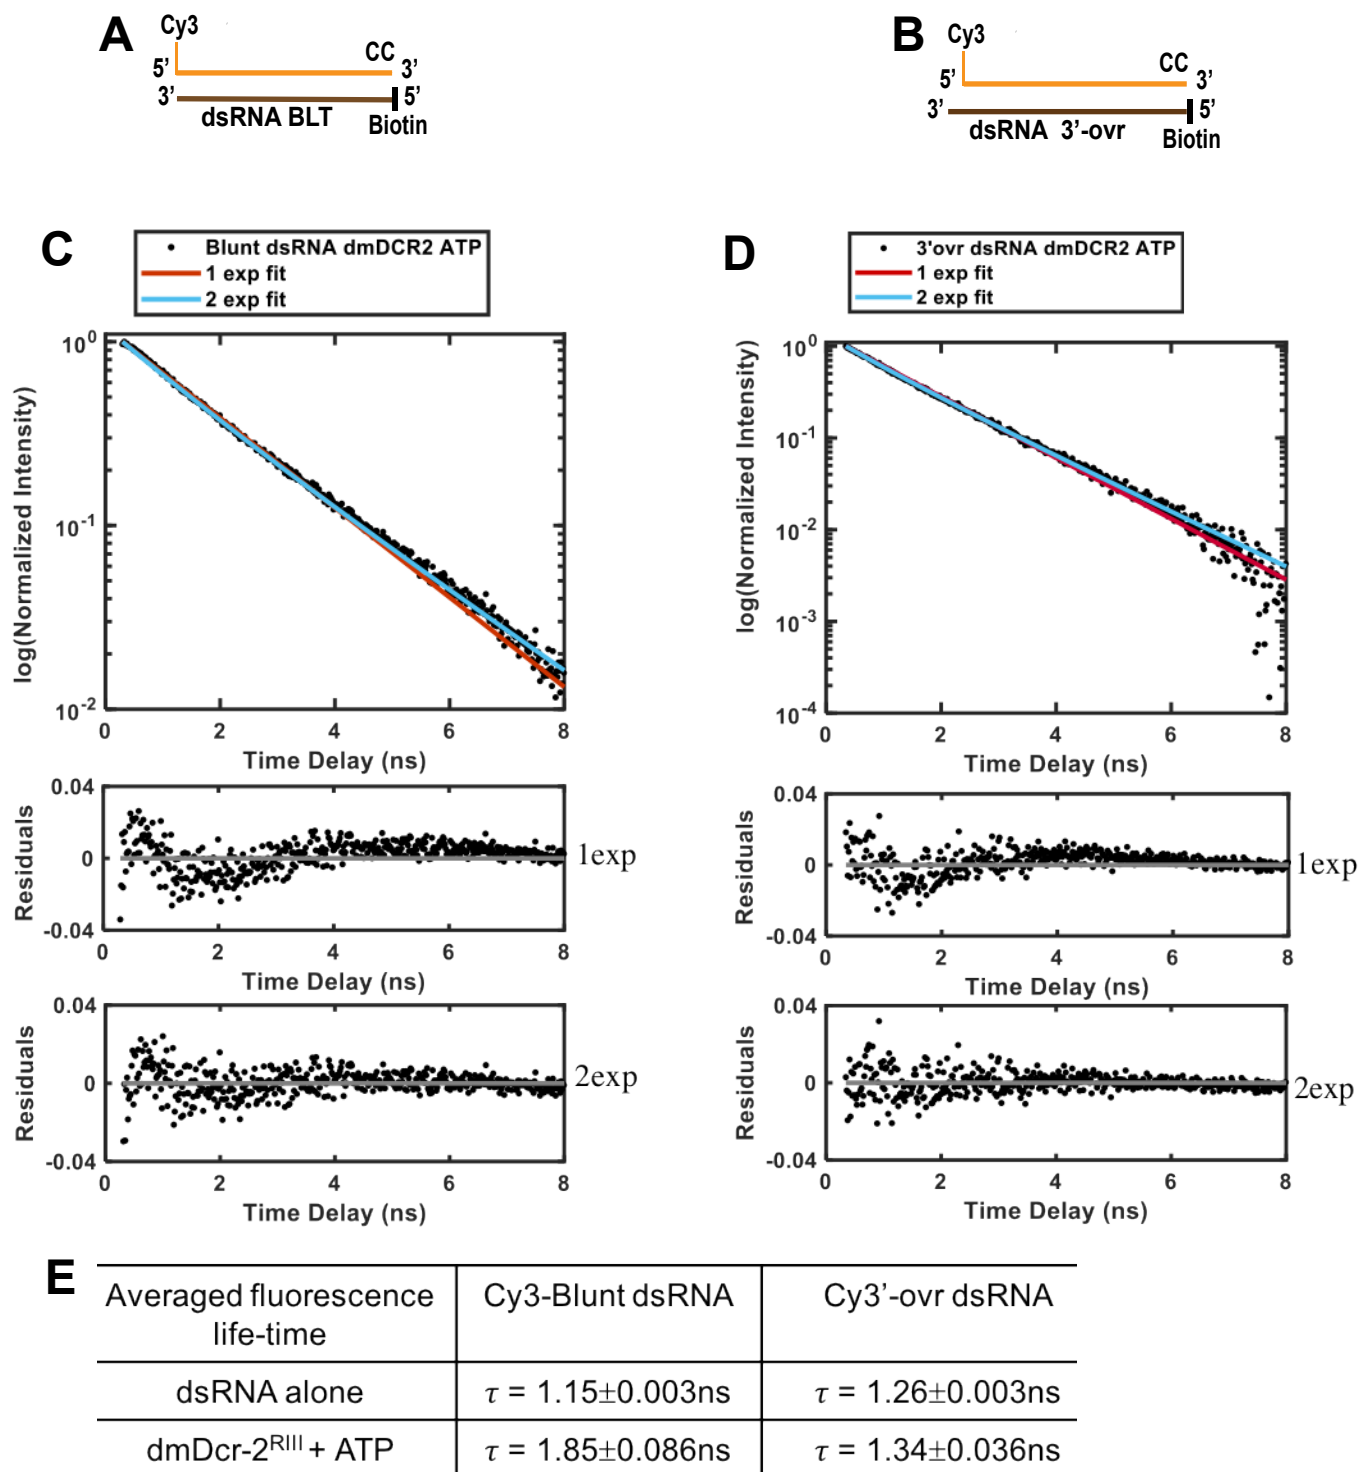

**Figure 6-supplement 2**

Supplement: supp [file elife_poa_e65810_Figure_6_figure_supplement_2.pdf › elife_poa_e65810_Figure_6_figure_supplement_2.pdf]
